# Supplementary material for: Monoclonal antibody targeting BDCA2 ameliorates skin lesions in systemic lupus erythematosus
Source: JCI journal article supplement (doi:10.1172/jci124466), 2019-01-15
Supplement: sd2 [file 2]

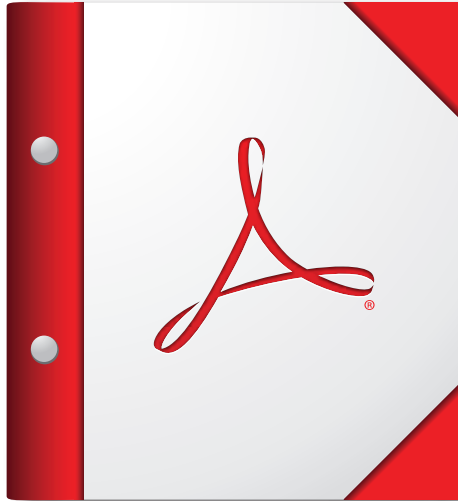

**For the best experience, open this PDF portfolio in  
Acrobat X or Adobe Reader X, or later.**

**Get Adobe Reader Now!**
